# Supplementary material for: Genome-wide identification of 5-methylcytosine sites in bacterial genomes by high-throughput sequencing of MspJI restriction fragments
Source: PubMed Central journal article supplement (PMC8112702; doi:10.1371/journal.pone.0247541), 2021-05-11
Supplement: pone.0247541.s001.pdf [file pone.0247541.s001.pdf]

## S1 Text. Description of S1 through S4 Data Sets.

These data sets comprise FASTA files from which the motifs in Tables 5 and 6 were determined. A representative set is included, and any files not included here are available upon request from the authors. Trimmed and merged reads from Illumina or Ion Torrent were processed in the following manner: duplicate reads were merged into a single entry, and all reads were mapped to (1) a reference sequence, (2) the MFRE activator oligonucleotide, and (3) sequences of size standards used in the gel purification process; only exact matches were marked as such. The results of this process were written to the “processed” FASTA files included here.

FASTA identifiers have the following format: “> source file | match information | read length | number of copies in the original read set.” Those reads where the match information begins with the word “reference”, all grouped at the start of the file, are exact reference matches and were used for motif identification. All others (labeled as “activator”, “marker\_plasmid”, “no matches”, etc.) were ignored. Reference sequences used for matching are as described in Table S5 with the exception of the M.Avall clone, for which *E. coli* BL21(DE3) was used.

File names are in the following format: “genome\_job-number\_cleavage-enzyme\_processed.fasta”. The relevant portions are the genome (as given in Tables 5, 6, and S5) and the cleavage enzyme (“MspJI”, “FspEI”, “MF” for MspJI+FspEI in combination, or “MFL” for MspJI+FspEI+LpnPI in combination).

Contents of the data set files are as follows:

### S1 Data Set (13 files):

*A. calcoaceticus* (MspJI)  
*A. hydrophila* (FspEI)  
*A. flos-aquae* (MspJI, FspEI)  
*Arthrobacter* sp. NEB688 (MspJI)  
*Bacillus* sp. N3536 (MspJI)  
*B. marisrubri* (MFL)  
Clone M.Avall (MspJI)  
*D. radiodurans* (MspJI, FspEI)  
*R. sphaeroides* 2.4.1 (MF)  
*R. sphaeroides* CH10 (MF)  
*X. badrii* (MspJI)

### S2 Data Set (3 files):

*A. gelatinovorum* (MspJI, FspEI)  
*A. citreus* (MF)

### S3 Data Set (5 files):

*B. megaterium* (MspJI)  
*B. stearothermophilus* (MspJI)  
*Moraxella* sp. ATCC49670 (MF)

*S. denitrificans* (MspJI, FspEI)

S4 Data Set (3 files):

*E. coli* DHB4 (FspEI)

*S. cremoris* (MspJ, FspEI)

S2 Text. The use of sequence logos for visualization of MFRE-Seq data.

S7 Table shows sequence logos corresponding to all of the motifs shown in Table 5. Each logo was derived from all putative CCMD reads of the (16,16) length corresponding to the motif in question. The read length and number of reads for each used are shown in the table.

Sequence logos have the advantage of visualizing certain sequence features not readily discernable from the computationally determined motif or nucleotide distributions. For example, an SSN repeat context is apparent around the methylated CTCGAG and TGCA sites of *Halorubrum*. In addition, the sequence requirements of the MspJI cleavage enzyme are easily visualized in the case of the GATC motif from *A. calcoaceticus*, the GCGC motif of the M.Hhal clone, and the GGWCC motif of the M.Avall clone. Finally, the lack of sequence context in the case of FspEI-cleaved *A. variabilis* genomic DNA shows why the CGATCG motif was not determined automatically.

However, the logos can also be misleading, as in the case of the RCCGGY motif of MspJI-cleaved *A. variabilis*, in part because it does not account for the dependencies between bases. Although the logo suggests a motif of RCHDGY, this is due to the presence of reads of other origin. S8 Table, which breaks down the representation of all possible RCHDGY sites in *A. variabilis*, shows that those sequences conforming to RCCGGY (in red) are almost completely methylated (as determined by MFRE-Seq reads), while all other sequences are not.

S1 Table. Base filtering of selected read structures containing CCWGG ( $L_2 = 31$ ) or CCWGG ( $L_4 = 29$ ).

| Motif <sup>a</sup>           | Read class | Read length | Base-Filter Pass |
|------------------------------|------------|-------------|------------------|
| <u>CC</u> <u>W</u> <u>GG</u> | (16,16)    | 29          | Yes              |
| <u>CC</u> <u>W</u> <u>GG</u> | (16,17)    | 30          | Yes              |
|                              |            |             |                  |
| <u>CC</u> <u>W</u> <u>GG</u> | (16,16)    | 31          | Yes              |
| <u>CC</u> <u>W</u> <u>GG</u> | (16,17)    | 32          | No               |
| <u>CC</u> <u>W</u> <u>GG</u> | (15,16)    | 30          | Yes              |

<sup>a</sup> Methylated bases are underlined, and bases used for base filtering are in boldface.

S2 Table. Number of (all / base-filtered) reads of various classes for lengths 30-32 bases.

| Class        | length 30       | length 31           | length 32    |
|--------------|-----------------|---------------------|--------------|
| (-13,18)     | 48/0            | –                   | –            |
| (-13,19+)    | 74/1            | 297/6               | 114/16       |
| (14,17)      | 1563/0          | –                   | –            |
| (14,18)      | –               | 16/0                | –            |
| (14,19+)     | –               | –                   | 12/0         |
| (15,17)      | –               | 19,919/0            | –            |
| (15,18)      | –               | –                   | 335/0        |
| (15,16)      | 120,429/120,429 | –                   | –            |
| (16,16)      | –               | 4,161,371/4,161,371 | –            |
| (16,17)      | –               | –                   | 1,440,996/0  |
| <b>Total</b> | 122,114/120,430 | 4,181,603/4,161,377 | 1,441,457/16 |

S3 Table. Comparison of enzyme activator oligonucleotides.<sup>a</sup>

| DNA           | Activator <sup>b</sup> | Exact Reference Matches |         | Exact Activator Matches |    |
|---------------|------------------------|-------------------------|---------|-------------------------|----|
|               |                        | Total                   | NR      | Total                   | NR |
| <i>B.sp.</i>  | none                   | 118,676                 | 54,577  | 2                       | 2  |
| <i>B.sp.</i>  | standard               | 167,275                 | 70,275  | 1069                    | 36 |
| <i>B.sp.</i>  | N                      | 79,810                  | 42,902  | 2                       | 2  |
| <i>B.sp.</i>  | U                      | 230,808                 | 89,091  | 124                     | 10 |
| <i>B.sp.</i>  | NU                     | 159,540                 | 69,711  | 3                       | 2  |
| <i>P.men.</i> | none                   | 1,774                   | 1647    | 8                       | 6  |
| <i>P.men.</i> | standard               | 169,887                 | 141,390 | 1185                    | 37 |
| <i>P.men.</i> | N                      | 154,787                 | 130,047 | 3                       | 2  |
| <i>P.men.</i> | U                      | 133,338                 | 111,331 | 42                      | 11 |
| <i>P.men.</i> | NU                     | 175,246                 | 146,740 | 9                       | 7  |

<sup>a</sup> Numbers of total and unique (“NR” = non-redundant) reads identified from Ion Torrent sequencing of libraries from digests of two genomic DNA samples using various activator oligonucleotides.

<sup>b</sup> Standard activator = CTGCCCAGGATCTTTTTTGATCCTGGCAG;  
 activator N = (c6)-CTGCCCAGGATCTTTTTTGATCCTGGCAG;  
 activator U = CTGCCCAGGATCUUUUUUGATCCTGGCAG;  
 activator NU = (c6)-CTGCCCAGGATCUUUUUUGATCCTGGCAG;  
 where C = m5C, U = deoxyuracil, and (c6) = 5'-amino modifier C6.

S4 Table. Motif calling by random downsampling of *E. coli* DHB4 reads of length 31 and copy number  $\geq 2$ .

| Downsample Factor | Total Input Reads ( $l_2=31$ ) | Reads Used ( $l_2=31, cn \geq 2$ ) | Motif         |
|-------------------|--------------------------------|------------------------------------|---------------|
| 1                 | 17,084                         | 11,714                             | CCWGG         |
| 5                 | 3,416                          | 2,323                              | CCWGG         |
| 25                | 683                            | 458                                | CCWGG         |
| 125               | 136                            | 96                                 | CCWGG         |
| 250               | 68                             | 54                                 | CCWGG         |
| 500               | 34                             | 28                                 | CCWGG         |
| 550               | 31                             | 23                                 | VNNNNNNNCCWGG |

S5 Table. Summary of m5C motifs identified in Tables 5 and 6.

| <b>Motif</b>             | <b>No. Genomes</b> | <b>m5C Arrangement (x)</b> | <b>CCMD Length (<i>l<sub>x</sub></i>)</b> |
|--------------------------|--------------------|----------------------------|-------------------------------------------|
| <u>AGCT</u>              | 1                  | +1                         | 34                                        |
| <u>CCGC</u> <sup>a</sup> | 1                  | -2                         | 31                                        |
| <u>CCGG</u>              | 1                  | -3                         | 30                                        |
| <u>CCGG</u>              | 2                  | -1                         | 32                                        |
| <u>CGCG</u>              | 2                  | -3                         | 30                                        |
| <u>GATC</u>              | 4                  | +3                         | 36                                        |
| <u>GCGC</u>              | 1                  | -1                         | 32                                        |
| <u>TGCA</u>              | 1                  | +1                         | 34                                        |
| <u>CCNGG</u>             | 2                  | -2                         | 31                                        |
| <u>CCWGG</u>             | 1                  | -4                         | 29                                        |
| <u>CCWGG</u>             | 5                  | -2                         | 31                                        |
| <u>GGNCC</u>             | 2                  | +4                         | 37                                        |
| <u>GGWCC</u>             | 2                  | +2                         | 35                                        |
| <u>CACGTG</u>            | 1                  | -1                         | 32                                        |
| <u>CGATCG</u>            | 3                  | -5                         | 28                                        |
| <u>CTCGAG</u>            | 1                  | -1                         | 32                                        |
| <u>GCCGGC</u>            | 2                  | -1                         | 32                                        |
| <u>GCRYGC</u>            | 1                  | -3                         | 30                                        |
| <u>GCTAGC</u>            | 1                  | -3                         | 30                                        |
| <u>GGNNCC</u>            | 1                  | +3                         | 36                                        |
| <u>RCCGGY</u>            | 3                  | -3                         | 30                                        |
| <u>YCGCGR</u>            | 1                  | -3                         | 30                                        |
| <u>RCWGGY</u>            | 1                  | -2                         | 31                                        |
| <u>CRCCGGYC</u>          | 1                  | -3                         | 30                                        |

<sup>a</sup> Non-palindromic.

S6 Table. Motifs discovered or confirmed with MFRE-Seq and the enzymes responsible.

| Organism                                                  | Motif         | Enzyme            | Previously Characterized <sup>a</sup> | GenBank Acc. |
|-----------------------------------------------------------|---------------|-------------------|---------------------------------------|--------------|
| <i>Acinetobacter calcoaceticus</i> ATCC49823 <sup>b</sup> | <u>CGCG</u>   | M.AcclI           | R (Mm)                                | CP050993     |
| <i>Acinetobacter calcoaceticus</i> ATCC49823 <sup>b</sup> | <u>GATC</u>   | <i>unassigned</i> | –                                     |              |
| <i>Aeromonas hydrophila</i>                               | <u>GCCGGC</u> | M.AhdIII          | –                                     | CP050994     |
| <i>Agrobacterium gelatinovorum</i> <sup>c</sup>           | <u>ACCGGT</u> | M.AgeI            | R (Mm)                                | CP051181     |
| <i>Agrobacterium gelatinovorum</i> <sup>c</sup>           | <u>CCWGG</u>  | <i>unassigned</i> | –                                     |              |
| <i>Anabaena flos-aquae</i> CCAP 1403/13 <sup>fd</sup>     | <u>GGNCC</u>  | <i>unassigned</i> | –                                     | CP051206     |
| <i>Anabaena flos-aquae</i> CCAP 1403/13 <sup>fd</sup>     | <u>RCCGGY</u> | M.AflIX           | –                                     |              |
| <i>Anabaena variabilis</i> ATCC27893 <sup>e</sup>         | <u>CGATCG</u> | M.AvaVIII         | Mm                                    | BA000019     |
| <i>Anabaena variabilis</i> ATCC27893 <sup>e</sup>         | <u>RCCGGY</u> | M.AvaIX           | Mms                                   |              |
| M.Avall clone ( <i>A. variabilis</i> ATCC27893)           | <u>GGWCC</u>  | M.AvaII           | R (Mm)                                | BA000019     |
| <i>Arthrobacter citreus</i> NEB577                        | <u>CCGC</u>   | M.Acil            | R (Mm)                                | CP053690     |
| <i>Arthrobacter</i> sp. NEB688                            | <u>AGCT</u>   | M.AsclI           | –                                     | CP053707     |
| <i>Bacillus megaterium</i> S2                             | <u>GCTAGC</u> | M.BmtI            | R (Mm)                                | CP051128     |
| <i>Bacillus megaterium</i> S2                             | <u>GATC</u>   | M.BmtII           | –                                     |              |
| <i>Bacillus</i> sp. N3536                                 | <u>GATC</u>   | M.BscXII          | R (Mm)                                | CP046057     |
| <i>Bacillus stearothermophilus</i> CPW16 <sup>f</sup>     | <u>RCCGGY</u> | M.BsrFI           | R (Mm)                                | CP051164     |
| <i>Bifidobacterium kashiwanohense</i> APCKJ1 <sup>g</sup> | <u>CCWGG</u>  | M.BkaJ1I          | –                                     | CP026729     |
| <i>Bermanella marisrubri</i>                              | <u>CCWGG</u>  | M.Bma65I          | –                                     | CP051183     |
| <i>Deinococcus radiodurans</i> <sup>h</sup>               | <u>YCGCGR</u> | M.DrdVII          | –                                     | CP031163     |
| <i>E. coli</i> DHB4                                       | <u>CCWGG</u>  | M.EcoDHB4Dcm      | Mms                                   | CP014270     |

|                                                  |                                                                         |                      |        |              |
|--------------------------------------------------|-------------------------------------------------------------------------|----------------------|--------|--------------|
| M.Hhal clone ( <i>Haemophilus haemolyticus</i> ) | <u>G</u> <u>C</u> <u>G</u> <u>C</u>                                     | M.Hhal               | Mms    | CP038817     |
| <i>Halorubrum</i> sp. BOL3-1                     | <u>C</u> <u>T</u> <u>C</u> <u>G</u> <u>A</u> <u>G</u>                   | <i>unassigned</i>    | –      | CP034692 and |
| <i>Halorubrum</i> sp. BOL3-1                     | <u>T</u> <u>G</u> <u>C</u> <u>A</u>                                     | <i>unassigned</i>    | –      | CP034693     |
| <i>Moraxella</i> sp. ATCC 49670 <sup>i</sup>     | <u>C</u> <u>C</u> <u>G</u> <u>G</u>                                     | M.Mspl               | Mms    | CP051211     |
| <i>Neisseria meningitidis</i> 95/134             | <u>G</u> <u>G</u> <u>N</u> <u>N</u> <u>C</u> <u>C</u>                   | M.Nme95II            | –      | CP021725     |
| <i>Neisseria meningitidis</i> 95/134             | <u>G</u> <u>C</u> <u>R</u> <u>Y</u> <u>G</u> <u>C</u>                   | M.Nme95III           | –      |              |
| <i>Neisseria meningitidis</i> 95/134             | <u>C</u> <u>C</u> <u>W</u> <u>G</u> <u>G</u>                            | M.Nme95IV + M.Nme95V | –      |              |
| <i>Pseudomonas maltophilia</i> <sup>j</sup>      | <u>C</u> <u>A</u> <u>C</u> <u>G</u> <u>T</u> <u>G</u>                   | M.PmII               | R (Mm) | CP051467     |
| <i>Pseudomonas maltophilia</i> <sup>j</sup>      | <u>R</u> <u>C</u> <u>C</u> <u>W</u> <u>G</u> <u>G</u> <u>Y</u>          | <i>unassigned</i>    | –      |              |
| <i>Pseudomonas mendocina</i>                     | <u>G</u> <u>G</u> <u>W</u> <u>C</u> <u>C</u>                            | M.Pmell              | R (Mm) | CP027657     |
| <i>Pseudomonas</i> sp. OM2164 <sup>k</sup>       | <u>C</u> <u>C</u> <u>W</u> <u>G</u> <u>G</u>                            | M.PspOMVI            | –      | CP051542     |
| <i>Rhodobacter sphaeroides</i> 2.4.1             | <u>C</u> <u>G</u> <u>A</u> <u>T</u> <u>C</u> <u>G</u>                   | M.Rsp241I            | –      | CP030272     |
| <i>Rhodobacter sphaeroides</i> CH10              | <u>C</u> <u>G</u> <u>A</u> <u>T</u> <u>C</u> <u>G</u>                   | M.RspCH10I           | –      | CP051469     |
| <i>Streptococcus cremoris</i> F <sup>l</sup>     | <u>C</u> <u>C</u> <u>N</u> <u>G</u> <u>G</u>                            | M1.ScrFI + M2.ScrFI  | Mm     | CP051518     |
| <i>Sulfurimonas denitrificans</i> DSM1251        | <u>C</u> <u>C</u> <u>N</u> <u>G</u> <u>G</u>                            | M.SdeAll             | Mm     | CP000153     |
|                                                  | <u>G</u> <u>A</u> <u>T</u> <u>C</u>                                     | M.SdeAVI             | Mm     |              |
|                                                  | <u>C</u> <u>G</u> <u>C</u> <u>G</u>                                     | M.SdeAORF121P        | Mm     |              |
|                                                  | <u>C</u> <u>C</u> <u>G</u> <u>G</u>                                     | M.SdeAORF1839P       | Mm     |              |
| <i>Xanthomonas badrii</i> <sup>m</sup>           | <u>C</u> <u>R</u> <u>C</u> <u>C</u> <u>G</u> <u>G</u> <u>Y</u> <u>G</u> | M.XbaIV              | –      | CP051651     |

<sup>a</sup> “Mm” = MTase motif was known from previous work, but methylated base was not; “R (Mm)” = MTase motif could be inferred from that of a characterized cognate REase; “Mms” = MTase motif and specific methylated base were known from previous work and confirmed here; “–” = neither motif nor methylated base were known previously and were newly determined here.

<sup>b</sup> Now renamed to *Chryseobacterium* sp. NEB161.

<sup>c</sup> Now renamed to *Thalassobius gelatinovor* NEB572.

- <sup>d</sup> Now renamed to *Dolichospermum flos-aquae* CCAP 1403/13F.
- <sup>e</sup> Now renamed to *Nostoc* sp. PCC 7120.
- <sup>f</sup> Now renamed to *Geobacillus subterraneus*.
- <sup>g</sup> Now renamed to *Bifidobacterium catenulatum* subsp. *kashiwanohense* APCKJ1.
- <sup>h</sup> Now renamed to *Deinococcus wulumuqiensis* NEB479.
- <sup>i</sup> Now renamed to *Acinetobacter* sp. NEB149.
- <sup>j</sup> Now renamed to *Stenotrophomonas maltiphila* NEB515.
- <sup>k</sup> Now renamed to *Paracoccus sanguinis* OM2164.
- <sup>l</sup> Now renamed to *Lactococcus lactis* subsp. *cremoris* F.
- <sup>m</sup> Now renamed to *Xa*



S7 Table. Sequence logos corresponding to the motifs identified in Table 5, including the length and number of sequences from which each was built. (See S2 Text for further information.)

| Sample                            | Enzyme | Read Length | No. Reads | Motif (Table 5) | Logo |
|-----------------------------------|--------|-------------|-----------|-----------------|------|
| <i>E. coli</i> DHB4               | F      | 31          | 12,058    | CCWGG           |      |
| <i>A. calcoaceticus</i> ATCC49823 | M      | 30          | 1,252     | CGCG            |      |
| <i>A. calcoaceticus</i> ATCC49823 | M      | 36          | 755       | GATC            |      |
| <i>Halorubrum</i> sp. BOL3-1      | M      | 32          | 3,107     | CTCGAG          |      |
| <i>Halorubrum</i> sp. BOL3-1      | M      | 34          | 650       | TGCA            |      |
| M.HhaI clone                      | M      | 31          | 9,582     | CCWGG           |      |
| M.HhaI clone                      | M      | 32          | 5,386     | GCGC            |      |
| <i>A. variabilis</i> ATCC27893    | M      | 30          | 1,576     | RCCGGY          |      |
| <i>A. variabilis</i> ATCC27893    | F      | 28          | 495       | CGATCG          |      |
| M.AvaI clone                      | M      | 35          | 277       | GGWCC           |      |

S8 Table. Analysis of the apparent RCHDGY motif in the sequence logo of *A. variabilis* (see S2 Text and S7 Table).

| Motif         | Sites in Genome | Fraction of Motif Sites | Sites with Reads | Fraction of Sites with Reads |
|---------------|-----------------|-------------------------|------------------|------------------------------|
| RCHDGY        | 47373           | 1.000                   | 1770             | 0.037                        |
| ACAAGC        | 2238            | 0.047                   | 32               | 0.014                        |
| GCAAGC        | 1518            | 0.032                   | 20               | 0.013                        |
| ACCAGC        | 2186            | 0.046                   | 43               | 0.020                        |
| GCCAGC        | 1233            | 0.026                   | 19               | 0.015                        |
| ACTAGC        | 1790            | 0.038                   | 26               | 0.015                        |
| GCTAGC        | 1081            | 0.023                   | 22               | 0.020                        |
| ACAGGC        | 1175            | 0.025                   | 13               | 0.011                        |
| GCAGGC        | 785             | 0.017                   | 8                | 0.010                        |
| <b>ACCGGC</b> | <b>353</b>      | <b>0.007</b>            | <b>321</b>       | <b>0.909</b>                 |
| <b>GCCGGC</b> | <b>361</b>      | <b>0.008</b>            | <b>309</b>       | <b>0.856</b>                 |
| ACTGGC        | 1698            | 0.036                   | 27               | 0.016                        |
| GCTGGC        | 1346            | 0.028                   | 29               | 0.022                        |
| ACATGC        | 10              | 0.000                   | 0                | 0.000                        |
| GCATGC        | 4               | 0.000                   | 0                | 0.000                        |
| ACCTGC        | 1518            | 0.032                   | 27               | 0.018                        |
| GCCTGC        | 817             | 0.017                   | 11               | 0.013                        |
| ACTTGC        | 1728            | 0.036                   | 18               | 0.010                        |
| GCTTGC        | 1530            | 0.032                   | 14               | 0.009                        |
| ACAAGT        | 1831            | 0.039                   | 11               | 0.006                        |
| GCAAGT        | 1647            | 0.035                   | 15               | 0.009                        |
| ACCAGT        | 2243            | 0.047                   | 28               | 0.012                        |
| GCCAGT        | 1720            | 0.036                   | 26               | 0.015                        |
| ACTAGT        | 1440            | 0.030                   | 15               | 0.010                        |
| GCTAGT        | 1773            | 0.037                   | 18               | 0.010                        |
| ACAGGT        | 1736            | 0.037                   | 25               | 0.014                        |
| GCAGGT        | 1531            | 0.032                   | 23               | 0.015                        |
| <b>ACCGGT</b> | <b>223</b>      | <b>0.005</b>            | <b>201</b>       | <b>0.901</b>                 |
| <b>GCCGGT</b> | <b>374</b>      | <b>0.008</b>            | <b>326</b>       | <b>0.872</b>                 |
| ACTGGT        | 2096            | 0.044                   | 21               | 0.010                        |
| GCTGGT        | 2236            | 0.047                   | 31               | 0.014                        |
| ACATGT        | 12              | 0.000                   | 0                | 0.000                        |
| GCATGT        | 8               | 0.000                   | 0                | 0.000                        |
| ACCTGT        | 1853            | 0.039                   | 24               | 0.013                        |
| GCCTGT        | 1177            | 0.025                   | 20               | 0.017                        |
| ACTTGT        | 1805            | 0.038                   | 15               | 0.008                        |
| GCTTGT        | 2297            | 0.048                   | 32               | 0.014                        |

S9 Table. MFRE cleavage properties of all known m5C motifs.<sup>a</sup>

| Motif                              | Palindrome | Ds Methylated | MspJI | FspEI  |
|------------------------------------|------------|---------------|-------|--------|
| AAC <u>G</u> TT                    | +          | +             |       |        |
| AC <u>C</u> CTGC                   |            |               |       |        |
| AC <u>G</u> CGT                    | +          | +             | 1     |        |
| AC <u>G</u> T                      | +          | +             | 0.25  |        |
| AG <u>C</u> T                      | +          | +             | 0.25  |        |
| AGGC <u>C</u> T                    | +          | +             | 0.25  | 1      |
| CAC <u>G</u> TC                    |            | +             |       |        |
| CAC <u>G</u> TG                    | +          | +             | 1     |        |
| <u>C</u> ASTG                      | +          | +             |       | 0.0625 |
| <u>C</u> ATG                       | +          | +             | 1     | 0.0625 |
| <u>C</u> CAG                       |            |               |       |        |
| <u>C</u> CAGA                      |            | +             | 1     |        |
| CCAGA                              |            |               |       |        |
| <u>C</u> CATGG                     | +          | +             |       | 0.0625 |
| <u>C</u> CCGC                      |            |               |       |        |
| <u>C</u> CCGT                      |            |               |       |        |
| <u>C</u> CD                        |            |               |       |        |
| <u>C</u> CGC                       |            | +             |       |        |
| <u>C</u> CGC                       |            |               |       |        |
| <u>C</u> CGCGG                     | +          | +             | 1     | 1      |
| <u>C</u> CGG                       | +          | +             | 0.25  | 1      |
| <u>C</u> CGG                       | +          | +             | 1     | 0.0625 |
| <u>C</u> CNGG                      | +          | +             | 1     | 1      |
| <u>C</u> CNGG                      | +          | +             | 1     | 0.0625 |
| <u>C</u> CTC                       |            |               |       |        |
| <u>C</u> CTGA                      |            | +             | 1     |        |
| <u>C</u> CTTC                      |            |               |       |        |
| <u>C</u> CTTC                      |            |               |       |        |
| <u>C</u> CWGG                      | +          | +             | 1     | 1      |
| <u>C</u> CWGG                      | +          | +             | 1     | 0.0625 |
| <u>C</u> G                         | +          | +             | 0.25  | 0.0625 |
| <u>C</u> GATCG                     | +          | +             |       | 0.0625 |
| <u>C</u> GCG                       | +          | +             | 1     | 0.0625 |
| <u>C</u> GGCCG                     | +          | +             |       | 0.0625 |
| <u>C</u> GGCCG                     | +          | +             | 0.25  |        |
| <u>C</u> GR                        |            |               |       |        |
| CR <u>C</u> CG <u>G</u> Y <u>G</u> | +          | +             | 1     |        |
| <u>C</u> TCGAG                     | +          | +             | 1     | 0.0625 |
| CT <u>C</u> GAG                    | +          | +             | 1     |        |
| CT <u>C</u> GAR                    |            | +             | 1     |        |
| <u>C</u> TGCAG                     | +          | +             |       | 0.0625 |
| CT <u>G</u> CAG                    | +          | +             | 0.25  |        |
| <u>C</u> TNAG                      | +          | +             | 1     | 0.0625 |
| <u>C</u> YCGRG                     | +          | +             | 1     | 0.0625 |

|          |   |   |      |          |
|----------|---|---|------|----------|
| GACGC    |   | + |      |          |
| GACGC    |   |   |      |          |
| GAGCTC   | + | + | 0.25 |          |
| GAGCTC   | + | + | 0.25 |          |
| GATC     | + | + | 0.25 |          |
| GC       | + | + | 0.25 |          |
| GCAGGC   |   | + | 1    |          |
| GCCCGGGC | + | + | 1    | 1        |
| GCCGGC   | + | + | 1    |          |
| GCCGGC   | + | + |      | 1        |
| GCGATCGC | + | + |      |          |
| GCGC     | + | + | 0.25 |          |
| GCGCGC   | + | + | 1    |          |
| GCNGC    | + | + | 0.25 |          |
| GCNGC    | + | + |      |          |
| GCNNGC   | + | + | 1    |          |
| GCSGC    | + | + |      |          |
| GCWGC    | + | + |      |          |
| GGATCC   | + | + |      |          |
| GGCC     | + | + | 0.25 |          |
| GGCGCC   | + | + |      |          |
| GGCGGA   |   |   |      |          |
| GGGAC    |   | + |      |          |
| GGGCC    | + | + | 0.25 |          |
| GGNCC    | + | + | 0.25 |          |
| GGNCC    | + | + | 0.25 | 1        |
| GGNNCC   | + | + | 0.25 |          |
| GGTCTC   |   |   |      |          |
| GGWCC    | + | + | 0.25 |          |
| GGWCC    | + | + | 0.25 | 1        |
| GGYRCC   | + | + | 0.25 |          |
| GKGCMC   | + | + | 0.25 | 1 (skew) |
| GRGCYC   | + | + | 0.25 |          |
| GTCGAC   | + | + |      |          |
| GTCTC    |   |   |      |          |
| GTGCAC   | + | + | 0.25 |          |
| GWGCWC   | + | + | 0.25 |          |
| RCATGY   | + | + | 1    |          |
| RCCGGY   | + | + | 1    |          |
| RCCGGY   | + | + |      | 1        |
| RCCGGB   |   | + | 1    |          |
| RGATCY   | + | + | 0.25 |          |
| RGCB     |   | + | 0.25 |          |
| RGCB     |   |   |      |          |
| RGCGCY   | + | + |      |          |
| RGCY     | + | + | 0.25 |          |
| RGGNCCY  | + | + | 0.25 |          |

|                                             |   |   |      |  |
|---------------------------------------------|---|---|------|--|
| RT <u>C</u> GAY                             | + | + |      |  |
| TCCG <u>C</u> C                             |   |   |      |  |
| T <u>C</u> GA                               | + | + | 0.25 |  |
| T <u>C</u> TGG                              |   |   |      |  |
| Y <u>A</u> CGTR                             | + | + | 1    |  |
| Y <u>C</u> G <u>C</u> GR                    | + | + | 1    |  |
| Y <u>G</u> <u>C</u> C <u>G</u> G <u>C</u> R | + | + | 1    |  |
| Y <u>G</u> <u>G</u> CCR                     | + | + | 0.25 |  |

<sup>a</sup> Motifs that are palindromic or are methylated on both strands (and therefore addressable by the MFRE technique) are marked with “+”. Cleavability by an MFRE is indicated by the fraction of sites cleavable; cleavage recognition elements outside the methylation motif limit the number of cleavable examples to 1/4 for MspJI and 1/16 for FspEI.

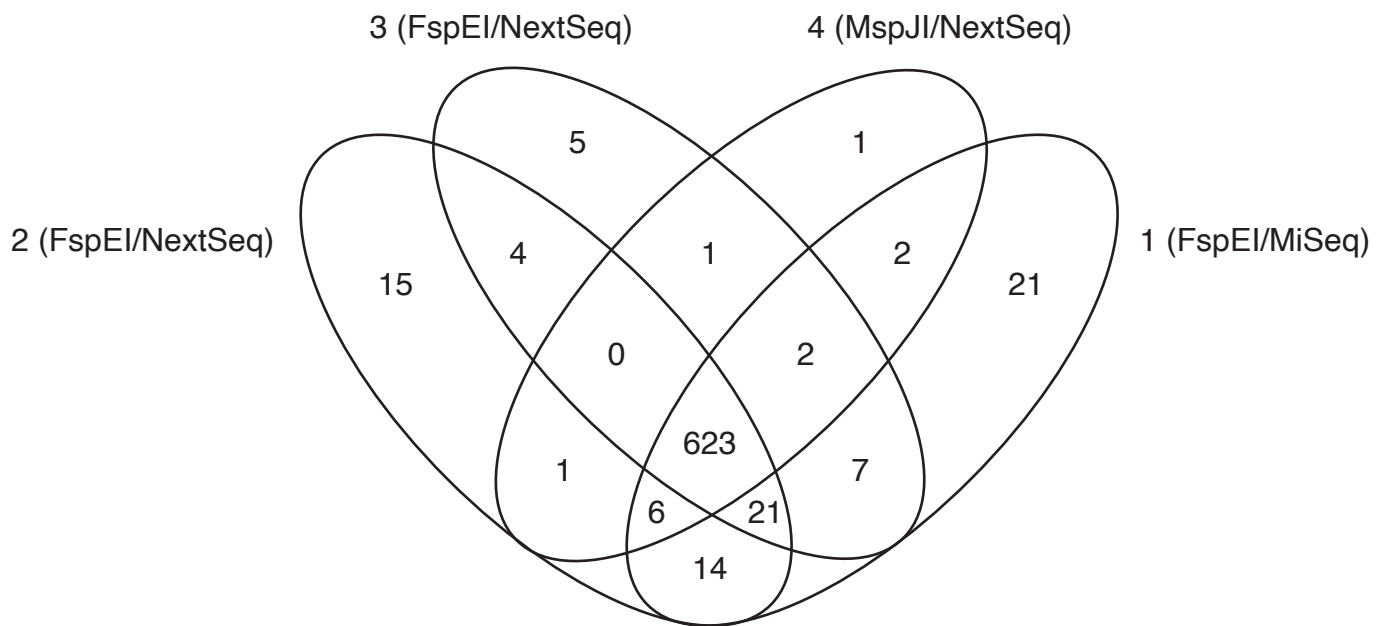

**Figure S1.** Venn diagram of unrepresented sites from the four libraries of *E. coli* K-12 DHB4 described in Table 2 (with corresponding numbering). Figures show the number of loci common to one or more libraries.

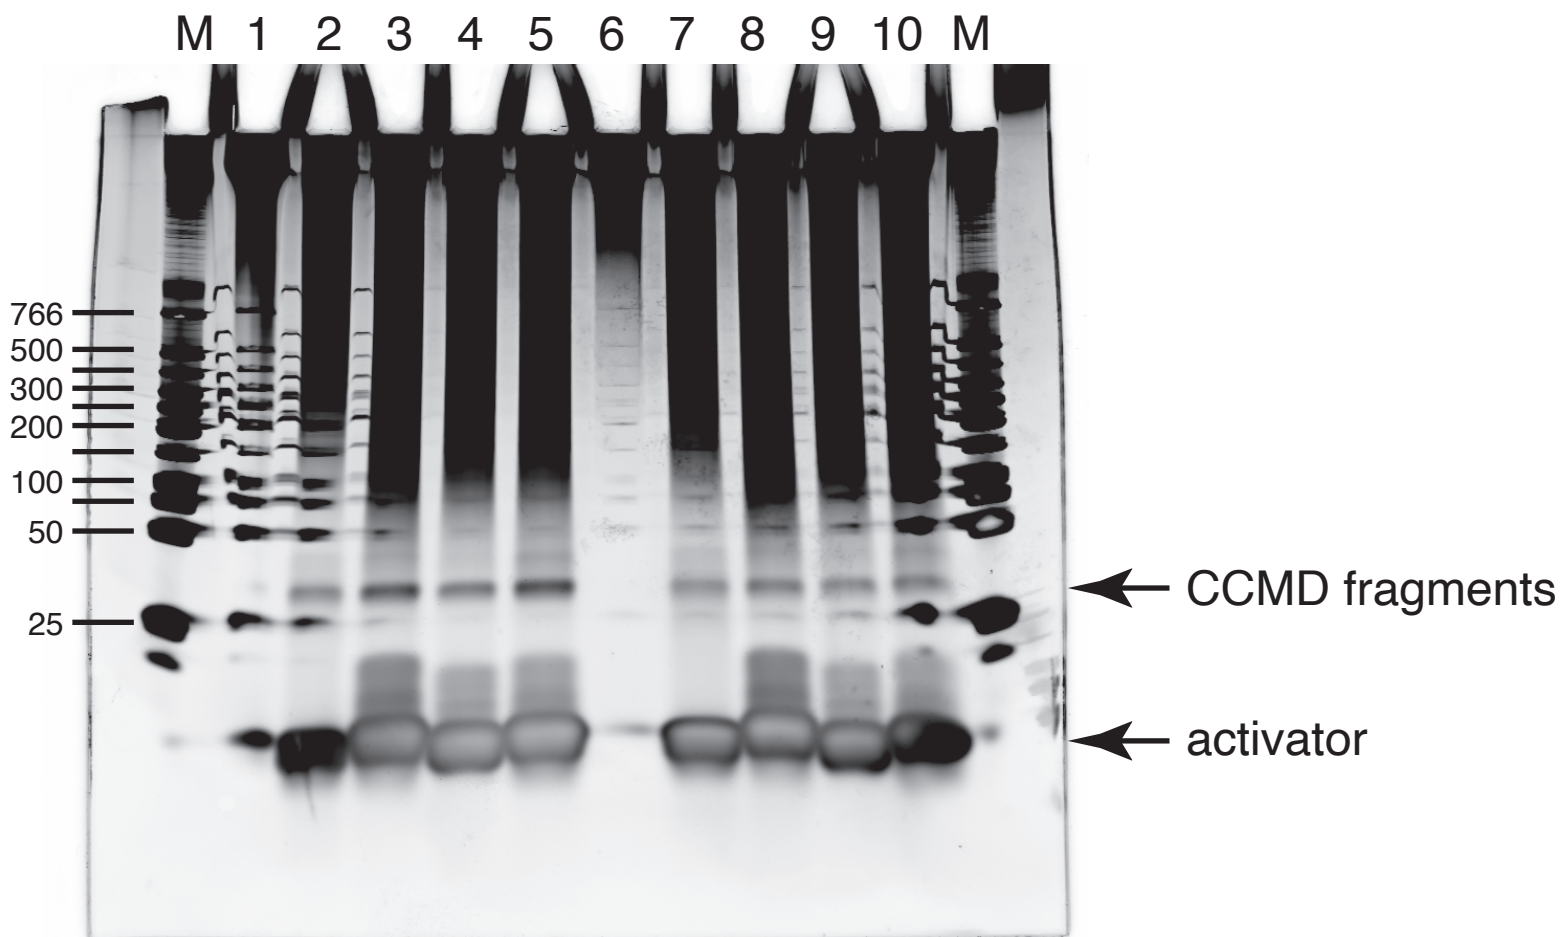

**Figure S2.** Gel photo (20% TBE-PAGE stained with SYBR Gold) of MFRE digest reactions showing activator and cleavage bands. All reactions were MspJI (1  $\mu$ L) digests of *E. coli* DHB4 genomic DNA with 0.525  $\mu$ M enzyme activator in 40  $\mu$ L 1x CutSmart buffer, 37°C 3 hrs.

M = Low Molecular Weight DNA Ladder (New England Biolabs); hash marks at left indicate the positions of the 11 bands of the marker, and selected sizes (in bp) are indicated. Lanes 1-5 contained 3  $\mu$ g genomic DNA, and lanes 6-10 contained 1.5  $\mu$ g genomic DNA. Activators: none (lanes 1 and 6), standard activator (lanes 2 and 7), activator-N (lanes 3 and 8), activator-U (lanes 4 and 9), or activator-UN (lanes 5 and 10).

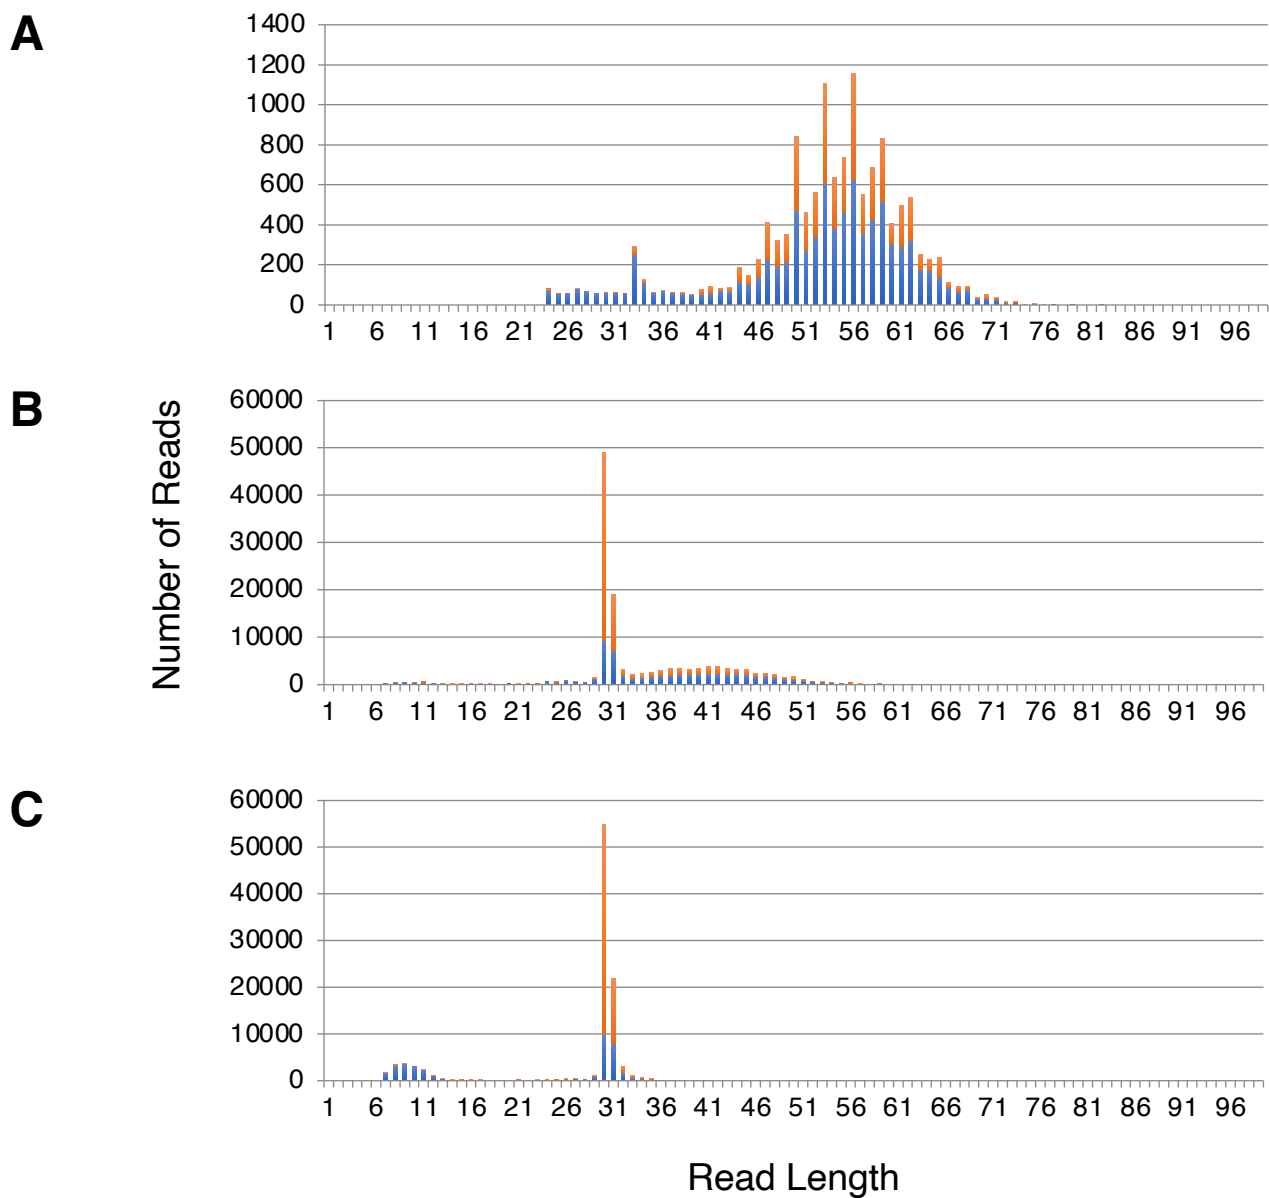

**Figure S3.** Examples of read distribution with 3 digest cleanup protocols. All 3 samples were digested with MspJI and sequenced on the Ion Torrent platform. For each length, the blue bar indicates the number of unique sequences and the orange bar indicates the number of additional duplicate sequences, so the combined height indicates the number of total reads. **A.** One-step spin-column cleanup, which keeps all fragments, small and large; *Arthrobacter* sp., CCMD length = 34. **B.** Two-step spin-column cleanup, which selects for fragments < 100 bp; *E. coli* DHB4, CCMD length = 31. **C.** Gel-purification of small fragments (20-50 bp range) from 20% polyacrylamide; *E. coli* DHB4, CCMD length = 31.
